# Supplementary material for: Phospholipid metabolic adaptation promotes survival of IDH2 mutant acute myeloid leukemia cells
Source: PubMed Central journal article supplement — Cancer Sci. 2023 Oct 26;115(1):197–210. doi: 10.1111/cas.15994 (PMC10823289; doi:10.1111/cas.15994), 2023-10-26
Supplement: CAS-115-197-s001.pdf [file CAS-115-197-s001.pdf]

# Supplemental Figure-3

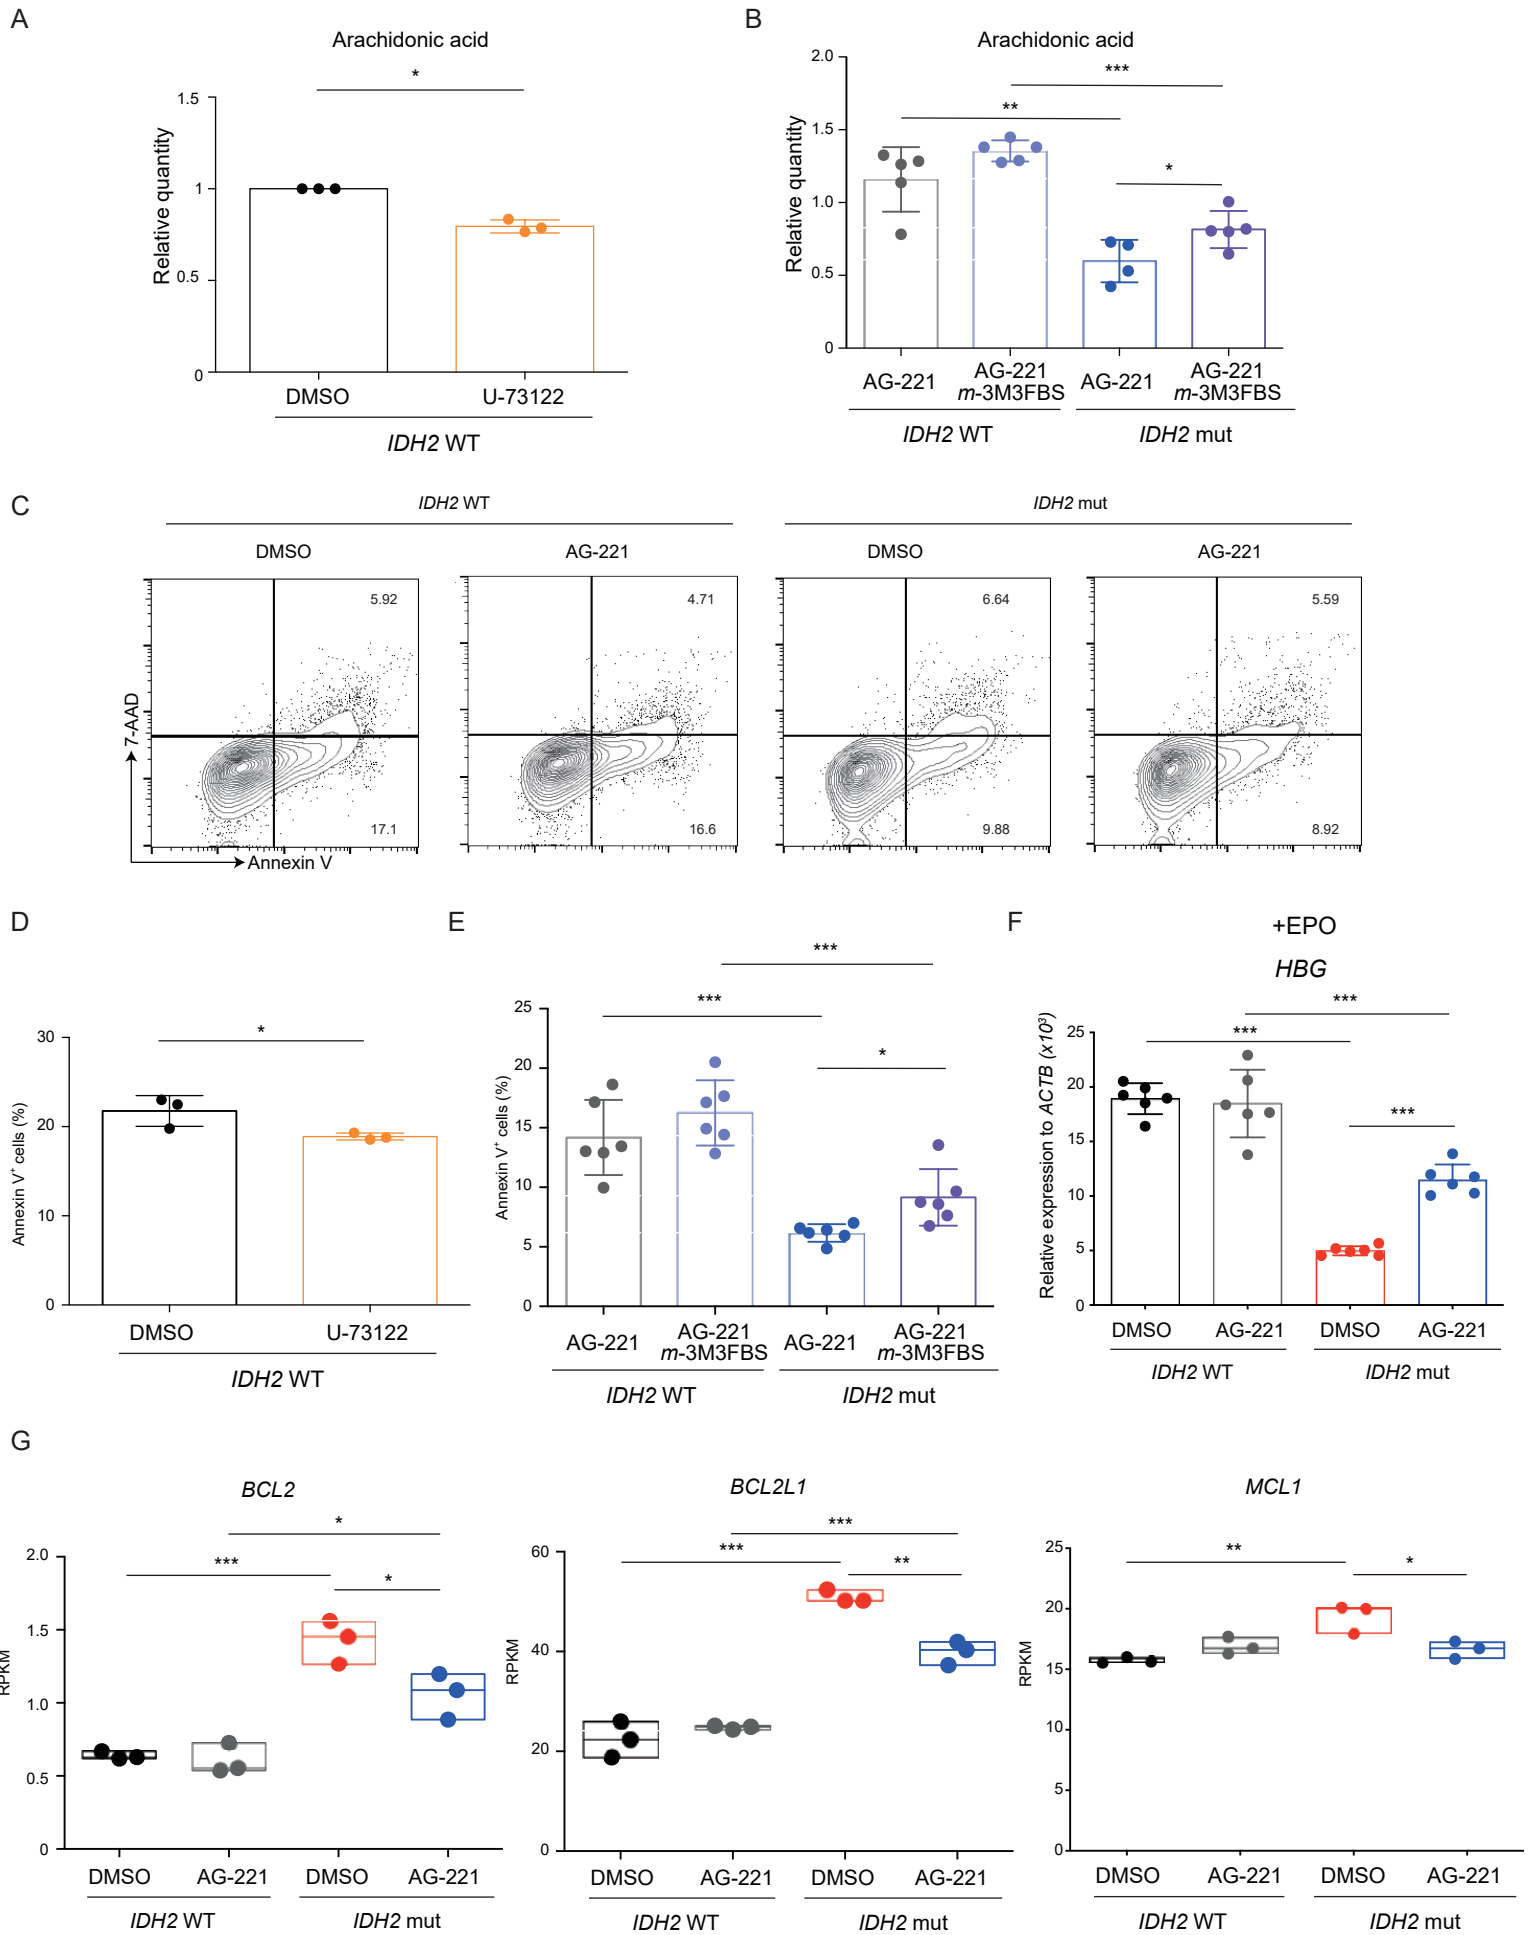

**Supplemental Figure 3. Apoptosis resistance in *IDH2* mut AML cells via the down-regulation of intracellular arachidonic acid**

(A) Quantities of intracellular arachidonic acid measured with GC-MS in *IDH2* WT TF-1 cells treated without (DMSO) or with U-73122 for 10 days. Relative values compared to *IDH2* WT TF-1 cells treated with DMSO were depicted. Statistical analysis was performed with paired two-tailed *t*-test (n=3 from 3 independent experiments). (B) Quantities of intracellular arachidonic acid measured with GC-MS in *IDH2* WT and *IDH2* mut TF-1 cells treated with AG-221 and m3M3FBS at the indicated combinations for 10 days. Relative values compared to *IDH2* WT TF-1 cells treated with DMSO were depicted. (n=4-5 from 4-5 independent experiments). (C) Representative FACS plots of Annexin V staining in *IDH2* WT and mut TF-1 cells treated without (DMSO) or with AG-221 for 3 days. (D) Percentage of Annexin V<sup>+</sup> cells in *IDH2* WT TF-1 cells treated without (DMSO) or with U-73122 for 3 days (n=3). (E) Percentage of Annexin V<sup>+</sup> cells in *IDH2* WT and *IDH2* mut TF-1 cells treated with AG-221 and *m*-3M3FBS at the indicated combinations for 10 days (n=6 from 2 independent experiments). (F) mRNA expression level of *HBG* in *IDH2* WT and mut TF-1 cells cultured with EPO and treated without (DMSO) or with AG-221 for 7 days (n=6 from 2 independent experiments). (G) mRNA expression level of *BCL2*, *BCL2L1* and *MCL1* in *IDH2* WT and *IDH2* mut TF-1 cells treated without (DMSO) or with AG-221 for 10 days. Expression level was represented in RPKM. \**p*<0.05, \*\**p*<0.01, \*\*\**p*<0.001 (two-tailed *t*-test).
