# Supplementary material for: Phospholipid metabolic adaptation promotes survival of IDH2 mutant acute myeloid leukemia cells
Source: PubMed Central journal article supplement — Cancer Sci. 2023 Oct 26;115(1):197–210. doi: 10.1111/cas.15994 (PMC10823289; doi:10.1111/cas.15994), 2023-10-26
Supplement: CAS-115-197-s006.pdf [file CAS-115-197-s006.pdf]

# Supplemental Figure-1

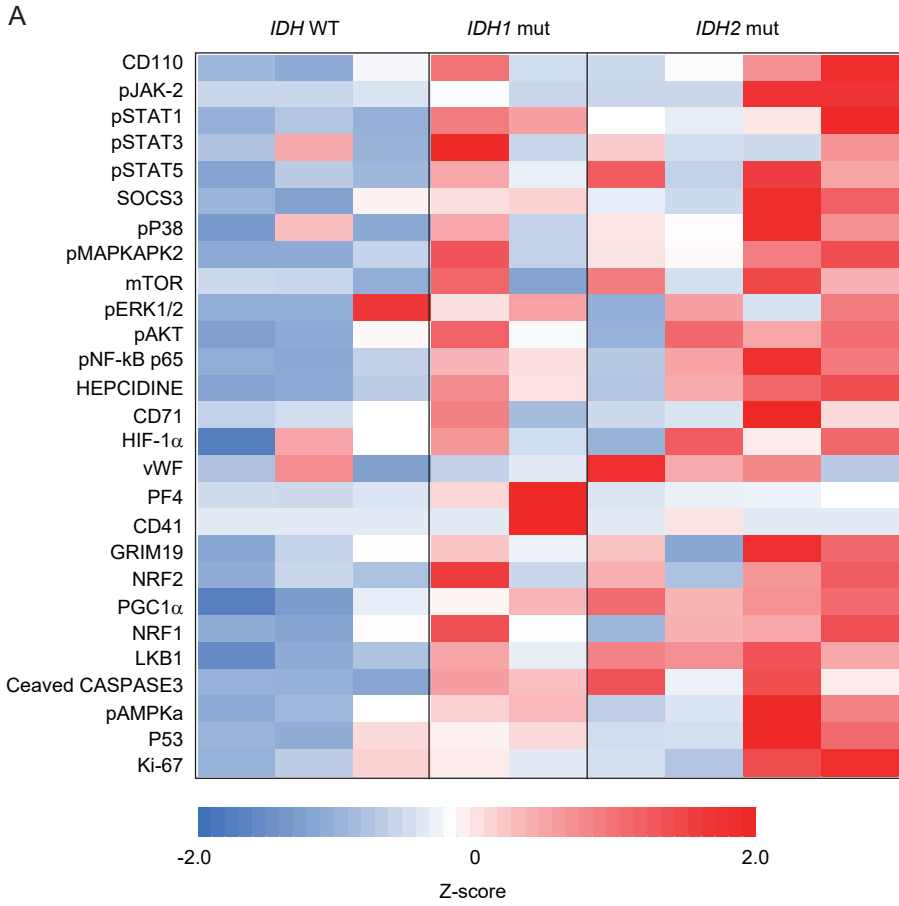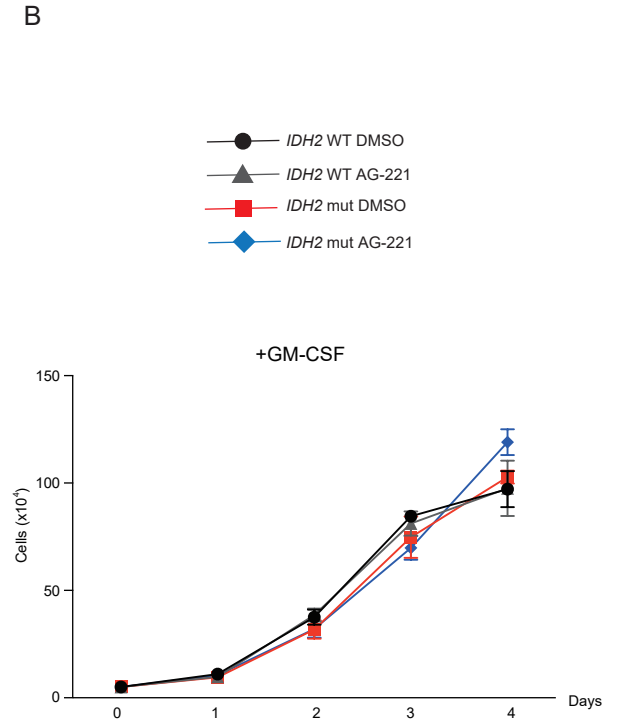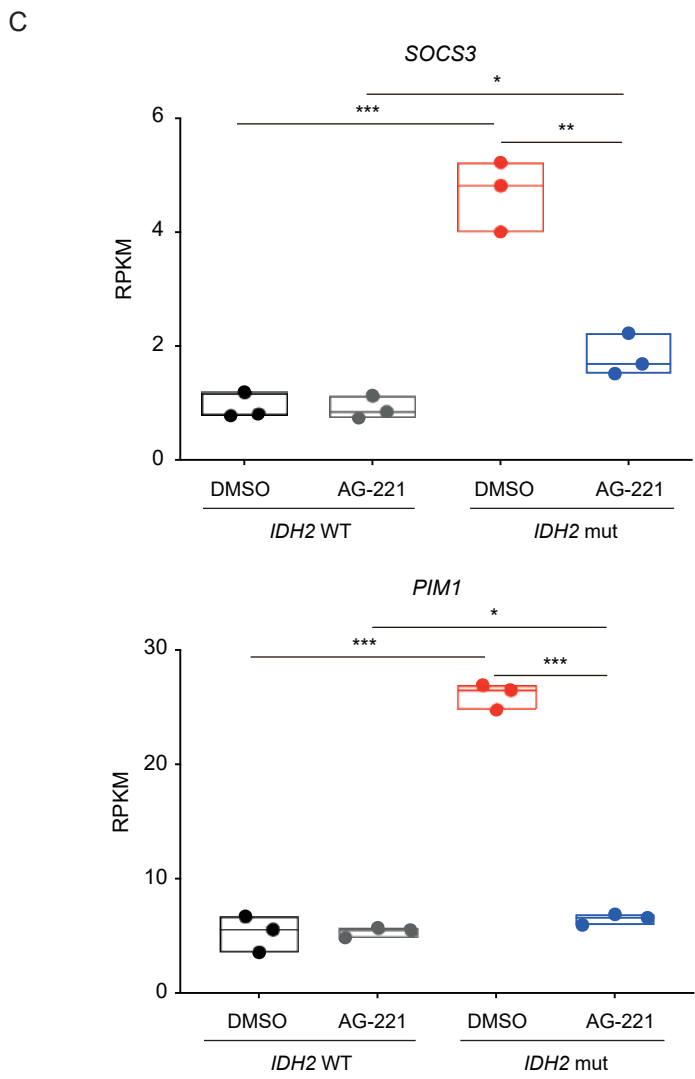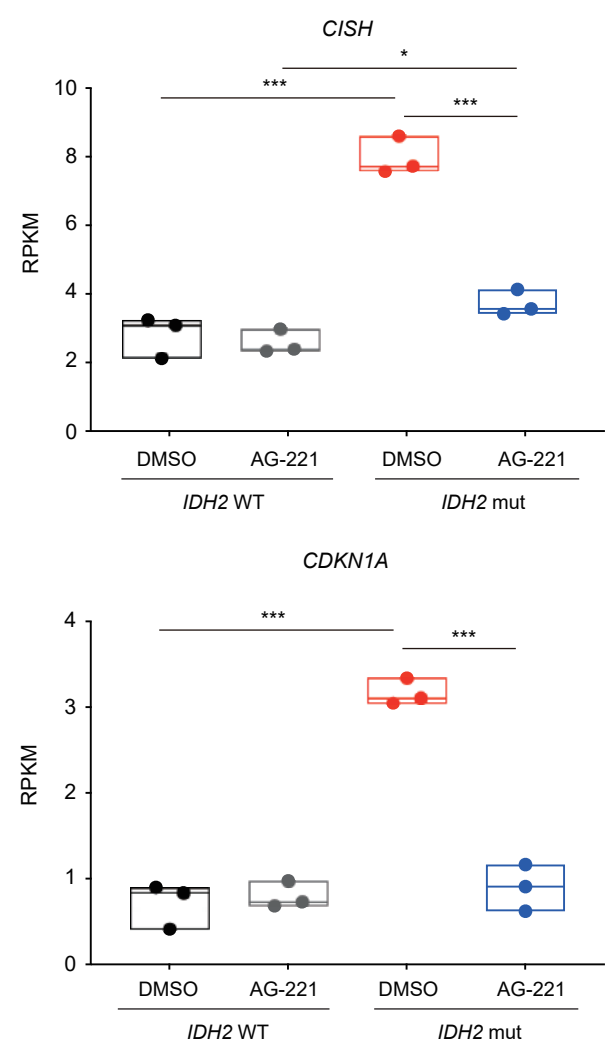

**Supplemental Figure 1. Intracellular 2-HG-dependent STAT phosphorylation promoted cell proliferation in *IDH* mut AML cells**

(A) Mass cytometry analysis in *IDH* WT and *IDH1/2* mut AML patient cells. Samples derived from 2-4 patients in each genotype were analyzed. Lineage negative cells were gated and analyzed for indicated proteins. Relative expression of each protein was indicated as a Z-score. (B) Live cell number of *IDH2* WT or *IDH2* mut TF-1 cells cultured with GM-CSF treated without (DMSO) or with a mut IDH2-specific inhibitor (AG-221) *in vitro* (n=3). (C) mRNA expression level of STAT5 target genes in *IDH2* WT and *IDH2* mut TF-1 cells treated without (DMSO) or with AG-221 for 10 days. Expression level is shown in RPKM. \* $p < 0.05$ , \*\* $p < 0.01$ , \*\*\* $p < 0.001$  (two-tailed *t*-test).
