# Supplementary material for: Phospholipid metabolic adaptation promotes survival of IDH2 mutant acute myeloid leukemia cells
Source: PubMed Central journal article supplement — Cancer Sci. 2023 Oct 26;115(1):197–210. doi: 10.1111/cas.15994 (PMC10823289; doi:10.1111/cas.15994), 2023-10-26
Supplement: CAS-115-197-s010.pdf [file CAS-115-197-s010.pdf]

# Supplemental Figure-5

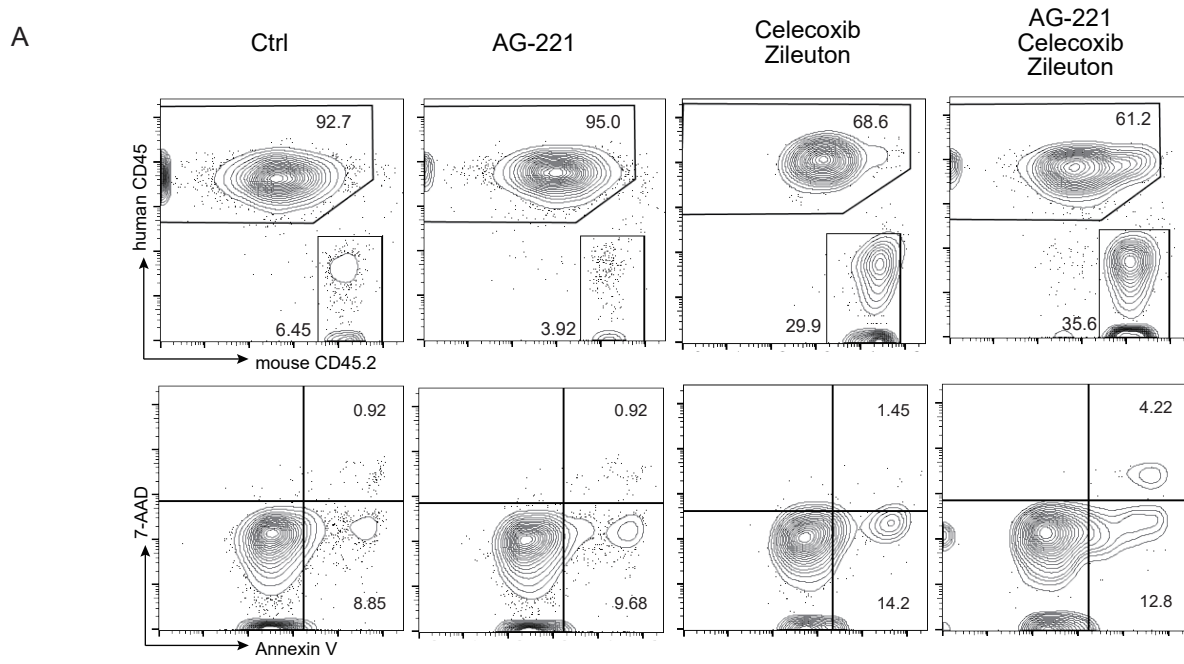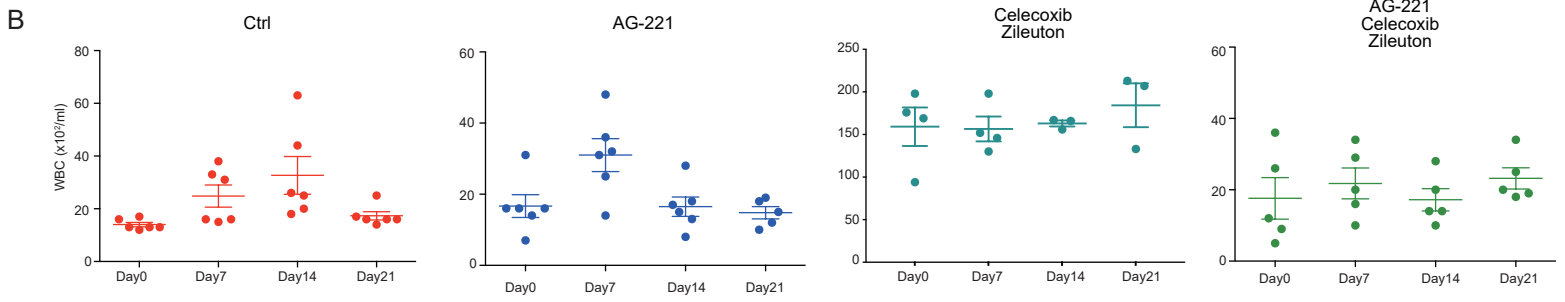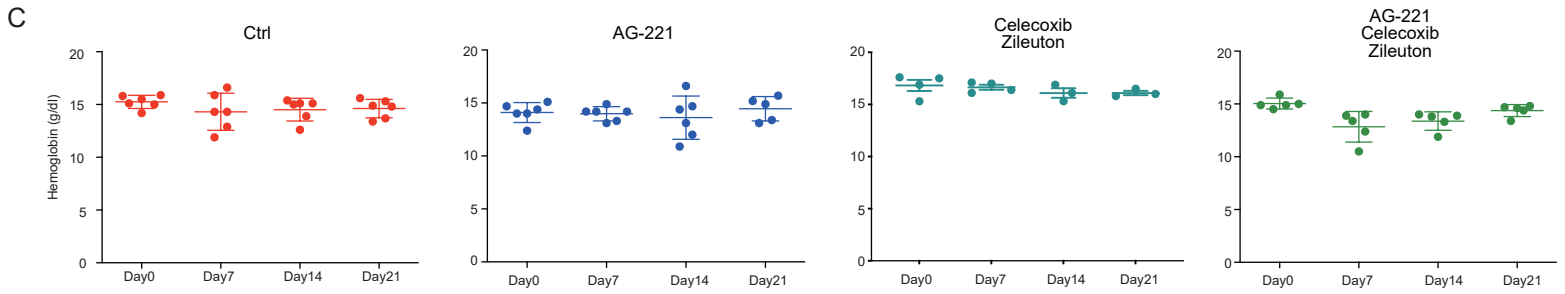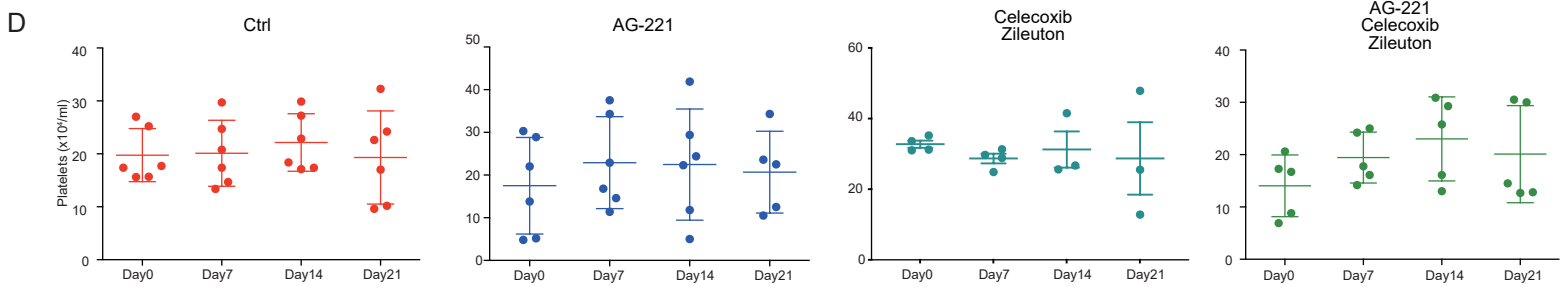

**Supplemental Figure 5. The anti-inflammatory drug treatment combined with the inhibition of mut IDH2 reduced tumor burden by inducing apoptosis in *IDH2* mut AML cells *in vivo***

(A) Representative FACS plots of chimerism analysis (upper) and Annexin V staining within human CD45<sup>+</sup> fraction (lower) in BM cells derived from left femur of drug-treated mice. (B-D) Peripheral blood analysis of drug-treated xenografted mice. White blood cell (WBC) count (B), hemoglobin (C) and platelet count (D) were depicted (n=3-6 from 3 independent experiments).
